# Supplementary material for: Influence of Accelerating Admixtures on the Reactivity of Synthetic Aluminosilicate Glasses
Source: MDPI journal article supplement (doi:10.3390/ma15030818), 2022-01-21
Supplement: s1 [file s1]

## SUPPLEMENTARY MATERIAL

# Influence of accelerating admixtures on the reactivity of synthetic aluminosilicate glasses

L. Gonzalez-Panicello, I. García-Lodeiro, F. Puertas, M. Palacios

*Eduardo Torroja Institute for Construction Science (IETcc-CSIC), Spain*

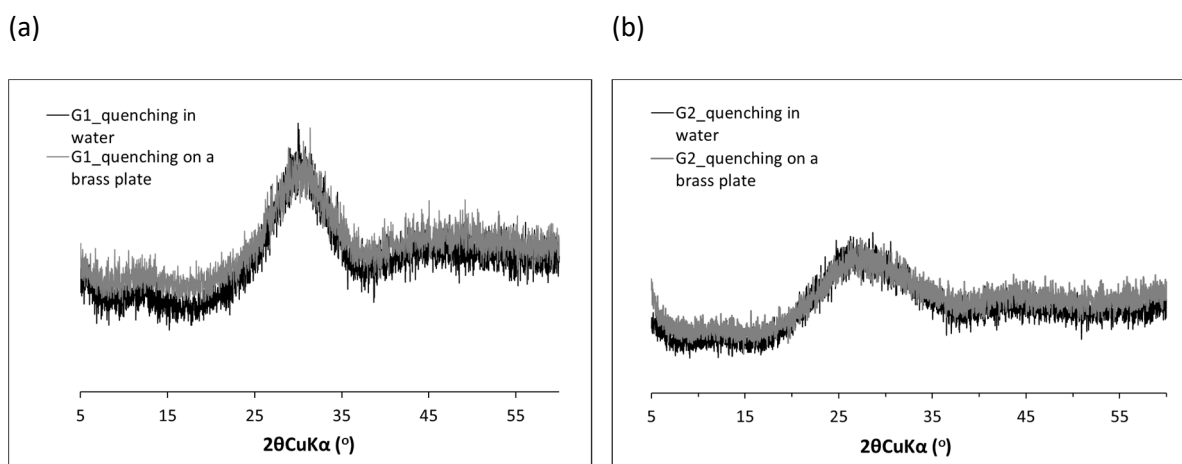

**Figure. S1.** X-ray powder diffraction (XRD) of (a) G-1 and (b) G-2 with and without the quenching method.

(a)

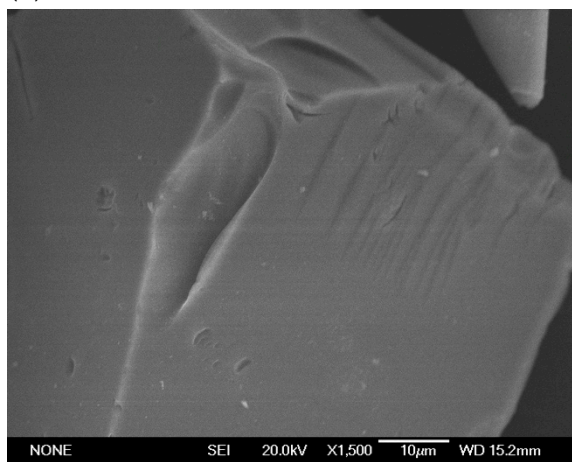

(b)

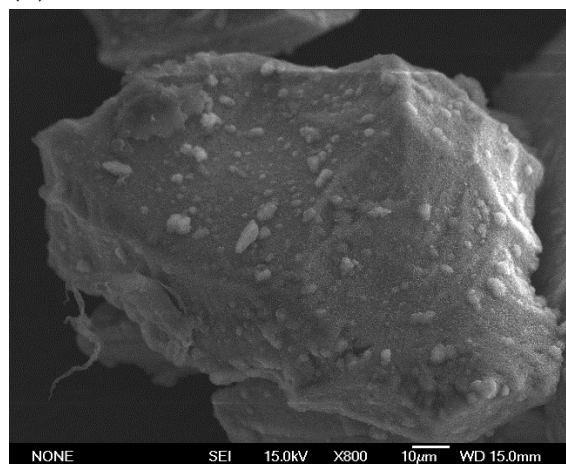

(c)

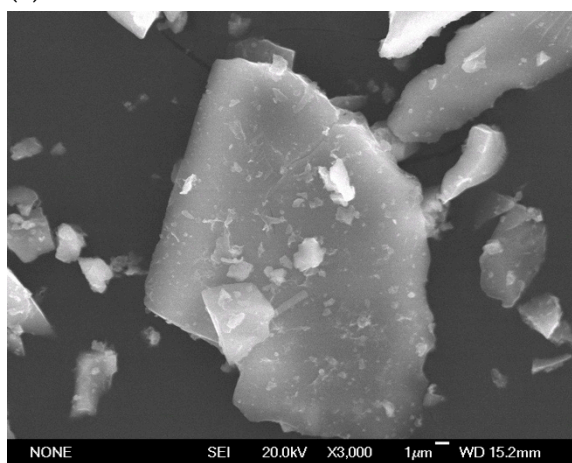

(d)

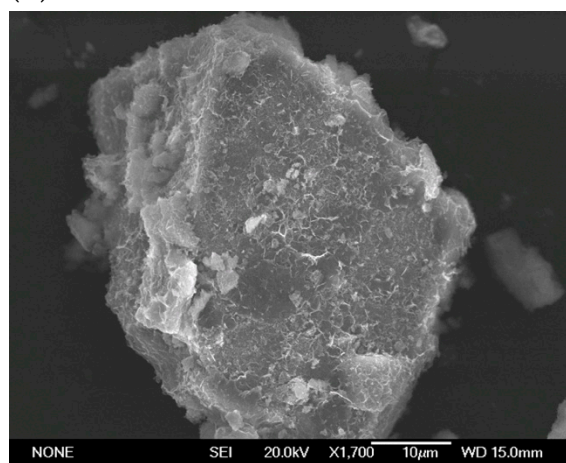

**Figure S2.** SEM images of (a) G-1 in 0.1M NaOH; (b) G-1 in 1M NaOH; (c) G-2 in 0.1M NaOH and (d) G-2 in 1M NaOH.

**Table S1.** Calculated saturation indexes of CNASH and Portlandite for after the dissolution test of G1 and G2 in far from equilibrium solutions in presence of the different chemical admixtures.

|     |              | Solid       | No<br>admixture | 0.02%<br>DEIPA | 0.02%<br>TIPA | 0.3%<br>NaSCN | 0.3%<br>Na <sub>2</sub> S <sub>2</sub> O <sub>3</sub> | 2%<br>Na <sub>2</sub> S <sub>2</sub> O <sub>3</sub> |
|-----|--------------|-------------|-----------------|----------------|---------------|---------------|-------------------------------------------------------|-----------------------------------------------------|
| G-1 | NaOH<br>0.1M | CNASH       | 1.2929          | 1.2646         | 1.1580        | 1.1911        | 1.1984                                                | 1.0465                                              |
|     | NaOH<br>1M   | CNASH       | 2.0398          | 1.1701         | 1.5555        | 1.7354        | 1.2281                                                | 3.8660                                              |
|     |              | Portlandite | 0.1947          | -              | 0.0829        | 0.1063        | 0.0007                                                | 0.1557                                              |
| G-2 | NaOH<br>0.1M | CNASH       | 1.0327          | 1.0377         | 1.0900        | 0.9564        | 1.0175                                                | 1.0196                                              |
|     | NaOH<br>1M   | CNASH       | 1.0198          | 1.0482         | 1.3702        | 1.2736        | 1.0345                                                | 1.0668                                              |
